# Supplementary material for: Molecular Characterization of Diverse Wheat Genetic Resources for Resistance to Yellow Rust Pathogen (Puccinia striiformis)
Source: MDPI journal article supplement (doi:10.3390/agronomy12122951), 2022-11-24
Supplement: s1 [file s1]

**Table S1:** Allele frequencies variations among YR susceptible, moderate and resistant bulks.

| Marker    | Bulk | Alleles |      |      |      |      |      |      |      |      |      |      |      |      |      |      |      |      |      |      |      |      |      |
|-----------|------|---------|------|------|------|------|------|------|------|------|------|------|------|------|------|------|------|------|------|------|------|------|------|
|           |      | 1       | 2    | 3    | 4    | 5    | 6    | 7    | 8    | 9    | 10   | 11   | 12   | 13   | 14   | 15   | 16   | 17   | 18   | 19   | 20   | 21   | 22   |
| Xgwm11    | S    | 0.5     | 0.13 | 0.13 |      |      | 0.29 | 0.29 |      |      | 0.5  |      |      |      |      |      |      |      |      |      |      |      |      |
|           | M    | 0.23    | 0.11 |      | 0.23 | 0.11 |      | 0.11 | 0.23 | 0.11 | 0.23 |      | 0.23 |      |      |      |      |      |      |      |      |      |      |
|           | R    | 0.11    | 0.11 | 0.11 | 0.23 | 0.23 | 0.37 | 0.37 | 0.11 |      | 0.37 | 0.23 |      |      |      |      |      |      |      |      |      |      |      |
| Xgwm295   | S    |         | 0.13 | 0.13 |      | 0.5  | 0.13 |      | 0.13 | 0.13 |      |      | 0.29 | 0.29 |      | 0.13 |      |      |      |      |      |      |      |
|           | M    | 0.11    |      | 0.23 | 0.23 |      |      | 0.11 | 0.11 | 0.11 | 0.11 |      | 0.23 | 0.11 |      | 0.11 |      |      |      |      |      |      |      |
|           | R    | 0.11    | 0.23 | 0.11 | 0.23 | 0.23 |      |      | 0.23 | 0.23 | 0.11 | 0.11 |      | 0.37 | 0.23 |      |      |      |      |      |      |      |      |
| Xgwm140   | S    | 0.29    | 0.13 | 0.13 |      | 0.13 | 0.13 | 0.29 | 0.5  | 0.13 |      | 0.13 | 0.13 | 0.13 |      | 0.13 | 0.13 |      |      |      |      |      |      |
|           | M    | 0.11    | 0.23 | 0.23 |      |      |      | 0.23 | 0.23 | 0.11 | 0.11 | 0.11 | 0.11 |      | 0.23 |      | 0.11 |      |      |      |      |      |      |
|           | R    | 0.37    | 0.11 | 0.11 | 0.11 |      |      | 0.11 | 0.23 | 0.11 |      | 0.11 | 0.37 |      |      | 0.11 | 0.23 |      |      |      |      |      |      |
| S23M41-27 | S    |         | 0.5  |      |      | 0.5  | 0.13 | 0.29 |      | 0.13 | 0.13 | 0.5  |      |      | 0.5  |      | 0.29 | 0.13 |      |      |      |      |      |
|           | M    |         | 0.11 |      | 0.37 | 0.37 | 0.11 |      | 0.11 |      | 0.11 | 0.11 | 0.11 |      | 0.37 | 0.11 | 0.23 | 0.11 |      |      |      |      |      |
|           | R    | 0.11    | 0.23 | 0.11 | 0.11 | 0.23 |      | 0.37 | 0.11 |      | 0.11 | 0.55 |      | 0.11 | 0.37 |      | 0.11 | 0.23 |      |      |      |      |      |
| csLV34    | S    |         |      | 0.13 | 0.29 | 0.13 |      |      | 0.13 | 0.29 |      | 0.29 |      | 0.13 | 0.5  |      |      |      | 0.13 | 0.13 |      |      |      |
|           | M    | 0.23    |      | 0.11 | 0.23 |      | 0.11 |      | 0.23 |      | 0.11 | 0.11 | 0.23 |      | 0.11 | 0.11 |      |      |      | 0.55 |      |      |      |
|           | R    | 0.11    | 0.23 |      | 0.11 | 0.11 |      | 0.11 | 0.23 | 0.23 |      | 0.11 | 0.11 | 0.23 | 0.11 | 0.11 | 0.11 | 0.11 |      | 0.23 |      |      |      |
| csLVMS1   | S    |         | 0.13 | 0.13 | 0.13 | 1    | 0.13 | 0.29 | 0.29 | 0.13 | 0.13 | 0.13 |      | 0.13 |      | 0.13 | 0.13 |      |      |      |      |      |      |
|           | M    | 0.11    |      | 0.11 | 0.11 | 1    | 0.11 | 0.11 | 0.37 | 0.23 | 0.23 |      |      |      |      | 0.11 |      |      |      |      |      |      |      |
|           | R    |         | 0.11 | 0.37 | 0.55 | 0.37 |      |      | 0.23 | 0.11 | 0.23 |      | 0.11 |      | 0.11 |      | 0.11 |      |      |      |      |      |      |
| Xbarc151  | S    | 0.13    | 0.13 | 1    | 0.29 | 0.13 | 1    | 0.13 |      | 0.13 | 0.13 |      | 0.13 |      |      |      |      |      |      |      |      |      |      |
|           | M    | 0.11    | 0.11 | 0.55 | 0.11 | 0.23 | 0.37 | 0.11 | 0.11 |      |      | 0.11 | 0.11 |      |      |      |      |      |      |      |      |      |      |
|           | R    | 0.23    | 0.23 | 1    | 0.11 | 0.23 | 0.23 | 0.11 | 0.11 | 0.23 | 0.23 | 0.11 |      |      |      |      |      |      |      |      |      |      |      |
| Xbarc181  | S    | 1       | 0.5  | 0.13 | 0.5  | 0.13 | 1    | 1    | 0.29 |      |      |      |      |      |      |      |      |      |      |      |      |      |      |
|           | M    | 0.55    | 0.55 |      | 0.55 |      | 0.55 | 0.37 | 0.11 |      |      |      |      |      |      |      |      |      |      |      |      |      |      |
|           | R    | 1       | 0.37 |      | 0.37 |      | 0.55 | 0.37 |      |      |      |      |      |      |      |      |      |      |      |      |      |      |      |
| Xwe173    | S    |         | 0.5  |      | 0.29 | 0.13 | 0.29 |      | 0.13 | 0.13 |      | 0.13 |      | 0.13 |      | 0.5  | 0.5  |      |      |      |      |      |      |
|           | M    |         | 0.37 | 0.11 | 0.23 | 0.11 | 0.11 | 0.23 |      |      | 0.23 | 0.11 | 0.11 | 0.23 | 0.11 | 0.23 |      | 0.55 | 0.11 |      |      |      |      |
|           | R    | 0.11    | 0.11 | 0.23 | 0.23 | 0.11 | 0.11 | 0.11 | 0.23 |      | 0.11 | 0.11 | 0.11 | 0.11 |      | 0.23 |      | 0.55 | 0.11 |      |      |      |      |
| Xwmc419   | S    | 0.29    | 0.13 | 0.13 | 0.13 |      | 0.13 | 0.29 |      |      |      |      |      |      |      |      |      |      |      |      |      |      |      |
|           | M    | 0.23    | 0.23 | 0.11 | 0.37 |      | 0.23 | 0.11 |      |      |      |      |      |      |      |      |      |      |      |      |      |      |      |
|           | R    | 0.55    | 0.11 |      | 0.23 | 0.11 | 0.23 | 0.23 |      |      |      |      |      |      |      |      |      |      |      |      |      |      |      |
| Xgwm191   | S    | 0.5     | 0.13 |      | 0.5  | 0.13 |      | 0.5  | 0.5  |      |      |      | 0.13 | 0.13 | 0.13 | 0.29 | 0.13 | 0.13 |      |      |      |      |      |
|           | M    | 0.23    | 0.37 | 0.11 | 0.23 | 0.37 | 0.11 | 0.11 |      | 0.11 |      | 0.11 | 0.37 | 0.23 | 0.23 |      | 0.37 | 0.11 |      |      |      |      |      |
|           | R    | 1       |      | 0.11 | 0.23 | 0.11 |      | 0.11 | 0.11 |      | 0.11 | 0.23 | 0.11 | 0.23 | 0.11 | 0.37 | 0.23 | 1    |      |      |      |      |      |
| Xgwm501   | S    | 0.5     | 0.29 | 0.29 | 0.13 |      |      | 0.13 |      | 0.5  | 0.13 |      |      |      |      |      |      |      |      |      |      |      |      |
|           | M    | 0.55    | 0.37 | 0.37 |      | 0.11 | 0.11 |      | 0.11 | 0.37 | 0.11 |      |      |      |      |      |      |      |      |      |      |      |      |
|           | R    |         | 0.37 | 0.37 | 0.23 | 0.11 | 0.23 | 0.11 | 0.11 | 0.55 |      |      |      |      |      |      |      |      |      |      |      |      |      |
| Xbarc7    | S    | 0.13    | 0.13 | 0.13 |      |      |      | 0.13 | 0.13 | 0.13 |      |      | 0.29 | 0.13 | 0.13 |      | 0.5  | 0.13 | 0.29 |      | 0.13 | 0.13 |      |
|           | M    | 0.23    | 0.11 | 0.23 | 0.23 | 0.11 | 0.11 | 0.23 | 0.11 | 0.23 | 0.11 | 0.11 | 0.23 |      | 0.23 | 0.11 | 0.23 | 0.11 | 0.37 | 0.23 | 0.11 |      |      |
|           | R    | 0.55    |      |      |      | 0.11 | 0.11 |      | 0.23 | 0.11 | 0.23 |      | 0.11 |      | 0.11 |      | 0.55 |      | 0.11 | 0.11 |      |      | 0.11 |

| Marker   | Bulk | Alleles |      |      |      |      |      |      |      |      |      |      |      |      |      |      |      |      |      |    |    |    |    |
|----------|------|---------|------|------|------|------|------|------|------|------|------|------|------|------|------|------|------|------|------|----|----|----|----|
|          |      | 1       | 2    | 3    | 4    | 5    | 6    | 7    | 8    | 9    | 10   | 11   | 12   | 13   | 14   | 15   | 16   | 17   | 18   | 19 | 20 | 21 | 22 |
| Xgwm-429 | S    |         | 0.13 | 0.13 | 0.13 | 0.13 | 0.5  | 0.13 | 0.13 | 0.13 | 0.13 | 0.29 |      | 0.13 | 0.13 | 0.13 |      | 0.29 | 0.13 |    |    |    |    |
|          | M    | 0.11    |      |      |      |      |      | 0.23 | 0.37 | 0.23 |      | 0.55 |      | 0.11 | 0.11 |      | 0.23 | 0.11 | 0.11 |    |    |    |    |
|          | R    |         |      |      |      | 0.11 | 0.37 |      |      | 0.11 | 0.23 |      |      |      |      |      |      |      |      |    |    |    |    |
| cssfr6   | S    | 0.5     | 0.13 | 0.5  | 0.5  | 0.13 |      | 0.29 | 0.5  | 0.13 | 0.5  |      | 0.5  | 0.5  | 0.29 |      |      |      |      |    |    |    |    |
|          | M    | 0.37    | 0.37 | 0.23 | 0.11 | 0.23 | 0.11 | 0.37 | 0.11 | 0.37 | 0.37 | 0.11 | 0.37 | 0.23 | 0.23 |      |      |      |      |    |    |    |    |
|          | R    | 0.23    | 0.55 | 0.11 | 0.11 | 0.55 | 0.11 | 0.11 | 0.37 | 0.23 | 0.11 | 0.11 | 0.23 | 0.37 | 0.37 |      |      |      |      |    |    |    |    |
| Xbarc101 | S    | 1       |      |      |      | 0.29 | 0.5  | 0.5  | 0.13 |      |      |      |      |      |      |      |      |      |      |    |    |    |    |
|          | M    | 0.55    | 0.37 | 0.37 |      | 0.11 | 0.11 | 1    |      | 0.11 |      |      |      |      |      |      |      |      |      |    |    |    |    |
|          | R    | 0.55    | 0.23 | 0.23 | 0.23 | 0.11 | 0.23 | 0.37 |      |      |      |      |      |      |      |      |      |      |      |    |    |    |    |
| SCAR1400 | S    | 0.13    | 1    | 0.5  | 0.13 | 0.5  |      |      |      |      |      |      |      |      |      |      |      |      |      |    |    |    |    |
|          | M    | 0.37    | 0.23 | 0.37 | 0.23 | 0.23 |      |      |      |      |      |      |      |      |      |      |      |      |      |    |    |    |    |
|          | R    | 0.37    | 0.55 | 0.37 | 0.23 | 0.37 |      |      |      |      |      |      |      |      |      |      |      |      |      |    |    |    |    |
| Xgwm-130 | S    | 0.5     | 0.5  | 1    | 0.13 | 1    | 1    |      |      |      |      |      |      |      |      |      |      |      |      |    |    |    |    |
|          | M    | 0.23    | 0.23 | 1    | 0.11 | 1    | 0.55 |      |      |      |      |      |      |      |      |      |      |      |      |    |    |    |    |
|          | R    | 0.11    | 0.11 | 0.55 | 0.11 | 0.55 | 0.37 |      |      |      |      |      |      |      |      |      |      |      |      |    |    |    |    |
| Xgwm-251 | S    | 0.13    | 0.13 | 1    | 0.13 | 0.13 | 0.13 | 0.13 | 1    | 0.29 |      | 0.13 | 0.13 | 0.13 | 0.13 | 0.13 |      |      |      |    |    |    |    |
|          | M    |         | 0.23 | 1    | 0.55 | 0.23 |      |      | 1    | 1    | 0.23 |      |      |      | 0.55 |      |      |      |      |    |    |    |    |
|          | R    | 0.11    |      | 0.55 | 0.11 | 0.37 | 0.11 | 0.11 | 0.37 | 0.23 |      | 0.11 | 0.11 | 0.11 | 0.37 | 0.11 |      |      |      |    |    |    |    |

**Key:** YR= yellow rust, S = susceptible, M = moderate, R = resistant
